# Supplementary material for: Comprehensive control over molecular weight distributions through automated polymerizations
Source: Royal Society of Chemistry journal article supplement (doi:10.1039/c9py01013k), 2019-01-01
Supplement: c9py01013k1.pdf [file c9py01013k1.pdf]

## Supporting Information

# Comprehensive control over molecular weight distributions through automated polymerizations

*Maarten Rubens<sup>[a][b]</sup> and Tanja Junkers<sup>[a][b]</sup>*

<sup>a</sup>Polymer Reaction Design Group, Universiteit Hasselt, Martelarenlaan 42, 3500 Hasselt, Belgium.

<sup>b</sup>Polymer Reaction Design Group, School of Chemistry Monash University 19 Rainforest Walk, Building 23, Clayton, Vic 3800 (Australia)

### Content

|                                                                                                               |     |
|---------------------------------------------------------------------------------------------------------------|-----|
| Experimental Setup .....                                                                                      | S 2 |
| Poly(Methyl Acrylate) with an $M_n$ of 3000 g·mol <sup>-1</sup> and a $\mathcal{D}$ of 1.2, 1.3 and 1.4 ..... | S 3 |
| Poly(Methyl Acrylate) with an $M_n$ of 2500 g·mol <sup>-1</sup> and a $\mathcal{D}$ of 1.6 .....              | S 4 |
| Poly(Methyl Acrylate) with an $M_n$ of 2000 g·mol <sup>-1</sup> and a $\mathcal{D}$ of 1.2, 1.3 and 1.4 ..... | S 5 |

## Experimental Setup

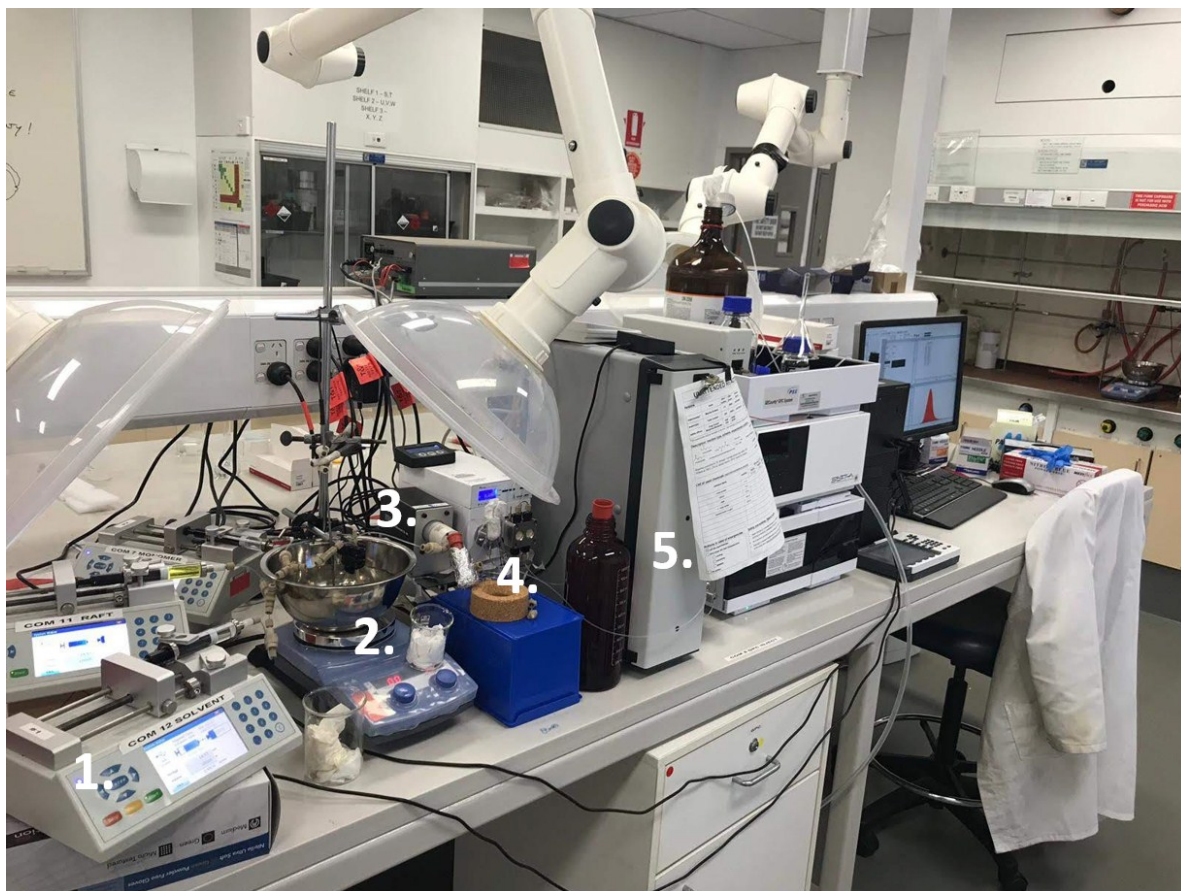

Figure 1: Overview of experimental setup to control molecular weight distribution through mixing. **1.** Chemyx Fusion 100 syringe pumps. **2.** Isothermal oil-bath containing continuous flow reactor. **3.** Switch valve to direct product stream to online-GPC or collection to flask. **4.** Collection vial. **5.** Online-GPC setup used for the autonomous optimization to a predefined molecular weight.

**Poly(Methyl Acrylate) with an  $M_n$  of 3000 g·mol<sup>-1</sup> and a  $\bar{D}$  of 1.2, 1.3 and 1.4**

*$M_n$  of 3000 g·mol<sup>-1</sup> and a  $\bar{D}$  of 1.21*

Three pMA samples of DP 27, 38 and 51 are synthesized with predetermined  $M_n$  according to the autonomous flow reactor system with targeted molecular weight and afterwards mixed together. See Table S1 for the individual fractions.

Table S1: Degree of polymerization (DP) and amount required of 3 pMA polymer samples to attain simulated MWD.

| <i>Entry</i> | <i>DP</i> | <i>M<sub>n</sub></i> | <i>n (μmol)</i> |
|--------------|-----------|----------------------|-----------------|
| <b>1</b>     | 27        | 2675                 | 10.91           |
| <b>2</b>     | 38        | 3622                 | 7.76            |
| <b>3</b>     | 51        | 4741                 | 5.74            |

*$M_n$  of 3000 g·mol<sup>-1</sup> and a  $\bar{D}$  of 1.30*

Three pMA samples of DP 24, 41 and 63 are synthesized with predetermined  $M_n$  according to the autonomous flow reactor system with targeted molecular weight and afterwards mixed together. See Table S2 for the individual fractions.

Table S2: Degree of polymerization (DP) and amount required of 3 pMA polymer samples to attain simulated MWD.

| <i>Entry</i> | <i>DP</i> | <i>M<sub>n</sub></i> | <i>n (μmol)</i> |
|--------------|-----------|----------------------|-----------------|
| <b>1</b>     | 24        | 2416                 | 12.23           |
| <b>2</b>     | 41        | 3880                 | 7.18            |
| <b>3</b>     | 63        | 5774                 | 4.60            |

$M_n$  of 3000 g·mol<sup>-1</sup> and a  $\bar{D}$  of 1.41

Four pMA samples of DP 21, 35, 55 and 80 are synthesized with predetermined  $M_n$  according to the autonomous flow reactor system with targeted molecular weight and afterwards mixed together. See Table S4 for the individual fractions.

Table S3: Degree of polymerization (DP) and amount required of 4 pMA polymer samples to attain simulated MWD.

| <i>Entry</i> | <i>DP</i> | $M_n$ | n (μmol) |
|--------------|-----------|-------|----------|
| <b>1</b>     | 21        | 2158  | 10.42    |
| <b>2</b>     | 35        | 3363  | 0.84     |
| <b>3</b>     | 55        | 5085  | 0.53     |
| <b>4</b>     | 80        | 7238  | 0.36     |

#### **Poly(Methyl Acrylate) with an $M_n$ of 2500 g·mol<sup>-1</sup> and a $\bar{D}$ of 1.6**

Five pMA samples of DP 15, 25, 40, 65 and 100 are synthesized with predetermined  $M_n$  according to the autonomous flow reactor system with targeted molecular weight and afterwards mixed together. See Table S5 for the individual fractions.

Table S4: Degree of polymerization (DP) and amount required of 5 pMA polymer samples to attain simulated MWD.

| <i>Entry</i> | <i>DP</i> | $M_n$ | n (μmol) |
|--------------|-----------|-------|----------|
| <b>1</b>     | 15        | 1642  | 10.00    |
| <b>2</b>     | 25        | 2503  | 8.00     |
| <b>3</b>     | 40        | 3794  | 5.60     |
| <b>4</b>     | 65        | 5946  | 4.20     |
| <b>5</b>     | 100       | 8960  | 1        |

**Poly(Methyl Acrylate) with an  $M_n$  of 2000 g·mol<sup>-1</sup> and a  $\bar{D}$  of 1.2, 1.3 and 1.4**

$M_n$  of 2000 g·mol<sup>-1</sup> and a  $\bar{D}$  of 1.21

Three pMA samples of DP 18, 25 and 32 are synthesized with predetermined  $M_n$  according to the autonomous flow reactor system with targeted molecular weight and afterwards mixed together. See Table S6 for the individual fractions.

Table S5: Degree of polymerization (DP) and amount required of 3 pMA polymer samples to attain simulated MWD.

| <i>Entry</i> | <i>DP</i> | <i>M<sub>n</sub></i> | <i>n (μmol)</i> |
|--------------|-----------|----------------------|-----------------|
| <b>1</b>     | 18        | 1900                 | 16.05           |
| <b>2</b>     | 25        | 2503                 | 11.76           |
| <b>3</b>     | 32        | 3105                 | 9.22            |

$M_n$  of 2000 g·mol<sup>-1</sup> and a  $\bar{D}$  of 1.30

Three pMA samples of DP 16, 27 and 41 are synthesized with predetermined  $M_n$  according to the autonomous flow reactor system with targeted molecular weight and afterwards mixed together. See Table S7 for the individual fractions.

Table S6: Degree of polymerization (DP) and amount required of 3 pMA polymer samples to attain simulated MWD.

| <i>Entry</i> | <i>DP</i> | <i>M<sub>n</sub></i> | <i>n (μmol)</i> |
|--------------|-----------|----------------------|-----------------|
| <b>1</b>     | 16        | 1728                 | 17.87           |
| <b>2</b>     | 27        | 2675                 | 10.91           |
| <b>3</b>     | 41        | 3880                 | 7.18            |

$M_n$  of 2000  $\text{g}\cdot\text{mol}^{-1}$  and a  $\bar{D}$  of 1.4

Four pMA samples of DP 14, 24, 37 and 54 are synthesized with predetermined  $M_n$  according to the autonomous flow reactor system with targeted molecular weight and afterwards mixed together. See Table S7 for the individual fractions.

Table S7: Degree of polymerization (DP) and amount required of 4 pMA polymer samples to attain simulated MWD.

| <i>Entry</i> | <i>DP</i> | $M_n$ | n ( $\mu\text{mol}$ ) |
|--------------|-----------|-------|-----------------------|
| <b>1</b>     | 14        | 1556  | 15.10                 |
| <b>2</b>     | 24        | 2417  | 9.17                  |
| <b>3</b>     | 37        | 3536  | 5.98                  |
| <b>4</b>     | 54        | 4999  | 4.06                  |
